# Supplementary material
Source: PubMed Central journal article supplement (PMC4465277)
Supplement: NIHMS689027-supplement-1.pdf [file NIHMS689027-supplement-1.pdf]

*H. sapiens* -----MPSLPLQEGVI---CGPSPLDLNTELPYC----- 25  
*M. musculus* -----MPSLPLQDGVV---CGSSPVDLMTTELPYC----- 25  
*A. carolinensis* -----MPSLPLNEGDN---QGNSSLTLRSDLSFC----- 25  
*G. gallus* -----MPSLPLNEGDN---HGTTAVTLRSELPHYC----- 25  
*X. laevis* -----MPSLPLNESDH---QATCSLSMHSDLPHYC----- 26  
*L. chalumnae* -----MPSFPNNAGN---QGTSSSLAMTTEISFC----- 25  
*D. rerio* -----MPSPPNDGDN---QRTSPMKMSPALTNC----- 25  
*S. kowalevskii* MHMAR**MPSASSLPLVYKM**SVTSSASISLSSLSYD**KGEQSAKISGSR**SATVMENGLDDDDDERQ 60

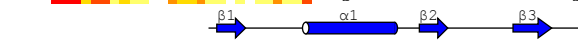

*H. sapiens* -----STMKRKVRK---KKKKGITITANVAGT**KFEIVRLVIDEMGF**EMKTPDE**DETSNLIWC**DS 79  
*M. musculus* -----CTMKRKRVRK---KKKKGITITANVAGT**KFEIVRLVIDEMGF**EMKTPDE**DETSNLIWC**DA 79  
*A. carolinensis* -----STIRRKVRE---KKKKGITITANVAGT**KYEVIVRVVIEEMGYL**KTRDE**DE**TANLIWSDC 79  
*G. gallus* -----STIKRKRVR---KKKNGVITANVAGT**KYEVIVRLVIEQELG**VKTRDE**DE**TANLIWSDC 78  
*X. laevis* -----SSSIKRKRARK---KKKNGAITANVVGT**KYEVIVRLVIEEMMF**TAKRDD**DE**TANLIWSDC 81  
*L. chalumnae* -----NTIKRKRVR---KKKKGITITANVAGT**KYEVIVRLAIDEMGF**IKTRDD**DD**TANLIWSDS 78  
*D. rerio* -----NGVKRKRVR**KKKKKGGFITANVIGT**KYEVIVRLVIE**ELT**HKARDD**DE**TANLIWSDS 81  
*S. kowalevskii* TRTSS**SSSNORQKTK**KKR**KKLP**IMINLS**CTKYEVIVRV**TVSE**DFGIITSKED**ONS**FLYWSDS** 120

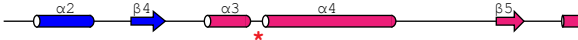

*H. sapiens* AVQ**QEKIT**DLQNYQRIN**HFPGMGEICR**KDFLARNMT**KMISRLD**IT**VF**RTWIF**FAEY**T 139  
*M. musculus* AVQ**QEKIT**DLQNYQRIN**HFPGMGEICR**KDFLARNMT**KMISRLD**IT**VF**RTWIF**FAEY**T 139  
*A. carolinensis* AVQ**QEKIAE**LERNYQRIN**HFPGMGEICR**KDFLARNMT**KMISRLD**IT**VF**RTWIF**FAEY**T 139  
*G. gallus* AVQ**QEKIAE**LERNYQRIN**HFPGMGEICR**KDFLARNMT**KMISRLD**IT**VF**RTWIF**FAEY**T 138  
*X. laevis* AVQ**QEKIAE**LERNYQRIN**HFPGMGEICR**KDFLARNMT**KMISRLD**IT**VF**RTWIF**FAEY**T 141  
*L. chalumnae* AVQ**QEKIAE**LERNYQRIN**HFPGMGEICR**KDFLARNMT**KMISRLD**IT**VF**RTWIF**FAEY**T 138  
*D. rerio* AVQ**QEKIAE**LERNYQRIN**HFPGMGEICR**KDFLARNMT**KMISRLD**IT**VF**RTWIF**FAEY**T 141  
*S. kowalevskii* EVSS**RI**VDL**KPYQRIN**HFPGMGEICR**KDCLARNIT**KIG**KAH**EE**EN**ES**ERTWIL**SEY**T** 180

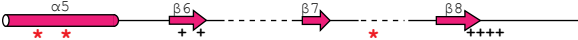

*H. sapiens* QFQNYV**KELKKR**RQK**TFIVK**PANGAMGHG**SILIR**NGDK**LPSQ**DHLIVQ**EYIE**K**PF**LM**EG** 199  
*M. musculus* QFQNYV**KELKKR**RQK**TFIVK**PANGAMGHG**SILIR**NGDK**LPSQ**DHLIVQ**EYIE**K**PF**LM**EG** 199  
*A. carolinensis* QFQNYV**KELKKR**RQK**TFIVK**PANGAMGHG**SILIR**NGDK**LPSQ**DHLIVQ**EYIE**K**PF**LM**EG** 199  
*G. gallus* QFQNYV**KELKKR**RQK**TFIVK**PANGAMGHG**SILIR**NGDK**LPSQ**DHLIVQ**EYIE**K**PF**LM**EG** 198  
*X. laevis* QFQTY**IKELKKR**RQK**TFI**IKPANGAMGHG**SILIR**NGDK**LPSQ**DHLIVQ**EYIE**K**PF**LM**ES** 201  
*L. chalumnae* QFQNYV**KELKKR**RQK**TFIVK**PANGAMGHG**SILIR**NGDK**LPSQ**DHLIVQ**EYIE**K**PF**LM**EG** 198  
*D. rerio* QFQNYV**KELKKR**GQK**TFIVK**PANGAMGHG**SILIR**NGDK**LPSQ**DHLIVQ**EYIE**K**PF**LM**EG** 201  
*S. kowalevskii* TFQ**CYVR**DL**LKKK**HK**TFI**CKPANGAMGHG**SIFR**NGEK**ITPQ**HDM**IQEY**LD**KPF**LD**IG** 240

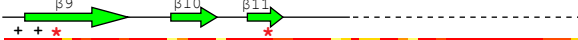

*H. sapiens* YKFDL**RIYIL**VTS**CDPI**KI**FLYH**DGLVR**MGTEKYI**PF**NE**SN**L**T**Q**LYM**HL**TN**YSV**NKH**NEH** 259  
*M. musculus* YKFDL**RIYIL**VTS**CDPI**KI**FLYH**DGLVR**MGTEKYI**PF**NE**SN**L**T**Q**LYM**HL**TN**YSV**NKH**NER** 259  
*A. carolinensis* YKFDL**RIYIL**VTS**CDPI**KI**FLYH**DGLVR**MGTEKYI**HP**PN**DS**N**LS**Q**LYM**HL**TN**YSV**NKH**NEH** 259  
*G. gallus* YKFDL**RIYIL**VTS**CDPI**K**VFLYH**DGLVR**MGTEKYI**HP**PN**DS**N**LS**Q**LYM**HL**TN**YSV**NKH**NEH** 258  
*X. laevis* YKFDL**RIYIL**VTS**CDPI**R**FLYND**GGLVR**MGTEKYH**SP**SE**NS**L**Q**S**LYM**HL**TN**YSV**NKH**NEH** 261  
*L. chalumnae* YKFDL**RIYIL**VTT**CDPI**R**FLYND**GGLVR**MGTEKYH**HP**PN**DS**N**LS**Q**LYM**HL**TN**YSV**NKH**NEH** 258  
*D. rerio* YKFDL**RFYIL**VTS**CDPI**R**FLYND**GGLVR**MGTEKYH**TP**NE**SN**L**Q**S**LYM**HL**TN**YSV**NKH**NEH** 261  
*S. kowalevskii* YKFDL**RVYIL**VTS**CDPI**R**FLYND**GGLVR**LST**E**KYCH**TE**SN**VD**QL**F**MHL**TN**YSV**NKH**SDN** 300

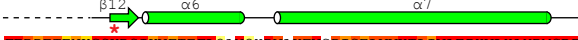

*H. sapiens* FERDE**TEN**GS**KRSIK**W**TFE**FLQ**ANQ**H**DAK**FN**SDISE**L**VV**KT**LI**VAEP**HVL**HAY**RM**CR**F** 319  
*M. musculus* FERNE**TED**K**S**G**S**K**S**I**K**W**TFE**FLQ**ANQ**H**DV**T**K**FN**SDISE**L**VV**KT**LI**VAEP**HVL**HAY**RM**CR**F** 319  
*A. carolinensis* FERDE**TED**K**S**G**S**K**S**I**K**W**TFE**FLQ**TN**HL**DV**S**K**FN**SDISE**L**VV**KT**LI**VAEP**HVL**HAY**RM**CR**F** 319  
*G. gallus* FERDE**TED**K**S**G**S**K**S**I**K**W**TFE**FL**ET**LN**DV**S**K**FN**SDISE**L**VV**KT**LI**VAEP**HVL**HAY**RM**CR**F** 318  
*X. laevis* FERDE**TEN**R**S**G**S**K**S**I**K**W**TFE**FL**ANDY**D**SK**FN**SDIS**L**VV**KT**LI**VAEP**HVL**HAY**RM**CR**F** 321  
*L. chalumnae* FERDE**TAD**R**S**G**S**K**S**I**R**W**TFE**FLQ**TNDY**D**V**M**K**FN**SDISE**L**VV**KT**LI**VAEP**HVL**HAY**RM**CR**F** 318  
*D. rerio* FERDE**TVD**K**S**G**S**K**S**I**G**W**TFE**FL**INDY**D**V**A**K**FN**SDISE**L**VV**KT**LI**VAEP**HVL**HAY**RM**CR**F** 321  
*S. kowalevskii* FEK**TDD**V**S**G**S**K**S**I**K**FL**ND**FL**R**K**ND**F**LAAL**K**S**I**AD**V**I**K**TM**V**VAEP**H**V**L**HAY**RM**CR**F 360

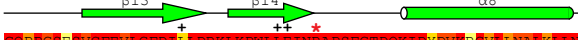

*H. sapiens* GQP**PG**SE**S**VC**F**EV**L**GF**D**IL**DR**KL**K**P**W**LL**E**IN**R**AP**S**FG**T**D**Q**K**ID**Y**D**V**K**R**G**V**L**L**N**A**K**L**L**N 379  
*M. musculus* GQP**PG**SE**S**VC**F**EV**L**GF**D**IL**DR**KL**K**P**W**LL**E**IN**R**AP**S**FG**T**D**Q**K**ID**Y**D**V**K**R**G**V**L**L**N**A**K**L**L**N 379  
*A. carolinensis* GQ**S**PG**S**EV**S**VC**F**EV**L**GF**D**IL**DR**KL**K**P**W**LL**E**IN**R**AP**S**FG**T**D**Q**K**ID**Y**D**V**K**R**G**V**L**L**N**A**K**L**L**N 379  
*G. gallus* GQ**AP**PG**S**EV**S**VC**F**EV**L**GF**D**IL**DR**KL**K**P**W**LL**E**IN**R**AP**S**FG**T**D**Q**K**ID**Y**D**V**K**R**G**V**L**L**N**A**K**L**L**N 378  
*X. laevis* GQ**H**PT**SE**S**IC**F**E**V**L**GF**D**IL**DR**KL**K**P**W**LL**E**IN**R**AP**S**FG**T**D**Q**K**ID**H**D**V**V**K**R**G**V**L**L**N**A**K**L**L**N** 381  
*L. chalumnae* GQP**PG**SE**S**VC**F**EV**L**GF**D**IL**DR**KL**K**P**W**LL**E**IN**R**AP**S**FG**T**D**Q**K**ID**F**D**V**K**N**G**V**L**V**N**A**L**R**L**L**N** 378  
*D. rerio* GQP**PG**SA**S**VC**F**EV**L**GF**D**IL**DR**KL**K**P**W**LL**E**IN**R**AP**S**FG**T**D**Q**K**ID**Y**D**V**V**K**G**A**L**L**N**A**K**L**L**N 381  
*S. kowalevskii* GQP**PG**SE**S**VC**F**EV**L**GF**D**IL**DR**KL**K**P**W**LL**E**IN**R**AP**S**FG**T**D**Q**K**ID**Q**E**I**G**L**L**E**D**T**RL**L**L**N 420

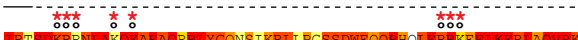

*H. sapiens* IRT**S**DK**R**KN**L**A**Q**K**AE**A**Q**R**R**LY**Q**NS**I**K**R**L**L**PG**S**SD**WE**Q**R**H**Q**L**ERR**K**E**L**K**ER**L**A**Q**V**R**K 439  
*M. musculus* IRT**S**DK**R**KN**L**A**Q**K**AE**A**Q**R**R**LY**Q**NP**V**R**L**SP**G**SS**D**WE**Q**R**H**Q**L**ERR**K**E**L**K**ER**L**L**Q**V**R**K** 439  
*A. carolinensis* IRT**S**DK**R**KN**L**A**Q**K**AE**A**Q**R**R**LY**Q**GS**M**K**R**L**SP**V**S**SD**WE**K**Q**R**S**L**ERR**R**E**L**K**ET**L**A**Q**V**R**K 439  
*G. gallus* IRT**S**DK**R**KN**L**A**Q**K**AE**A**Q**R**R**LY**Q**GS**M**K**R**L**L**PG**S**SD**WE**K**Q**R**S**L**ERR**R**E**L**K**ER**L**A**Q**V**R**K 438  
*X. laevis* IRT**S**DK**R**KN**L**A**Q**K**AE**A**Q**R**R**LY**Q**GS**M**K**R**L**SP**AS**S**SD**WE**K**Q**R**H**T**L**ERR**K**E**L**K**ER**L**S**Q**V**R**K** 441  
*L. chalumnae* IRT**S**DK**R**KN**L**A**Q**K**AE**A**Q**R**R**LY**GL**SS**I**K**R**L**SP**SS**D**WE**Q**R**H**T**L**ERR**K**V**E**L**K**ER**L**A**Q**V**R**K 438  
*D. rerio* IRT**S**DK**R**KN**L**A**Q**K**AE**A**Q**R**R**LY**Q**GS**M**K**R**L**T**AG**S**SE**W**E**K**Q**R**H**L**ERR**R**E**L**K**ER**L**A**Q**V**R**K** 441  
*S. kowalevskii* IRT**S**DK**R**KN**L**A**Q**K**AE**A**Q**R**R**LY**Q**GS**M**K**R**L**L**PG**S**SD**WE**Q**R**H**Q**L**ERR**R**E**L**K**ER**L**A**Q**V**R**K 478

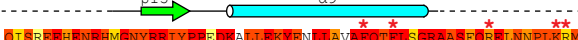

*H. sapiens* QIS**RE**E**EN**R**H**M**G**N**Y**R**R**I**Y**P**PE**D**K**L**L**E**K**Y**EN**L**L**A**F**Q**T**F**L**S**G**R**A**A**S**F**Q**R**E**M**N**N**PL**K**R**K 499  
*M. musculus* QV**S**Q**E**E**EN**R**H**M**G**N**Y**R**R**I**Y**P**PE**D**K**L**L**E**K**Y**EG**L**L**A**F**Q**T**F**L**S**G**R**A**A**S**F**Q**R**E**M**N**N**PL**K**R**K 499  
*A. carolinensis* QIS**KE**E**EN**R**H**M**G**N**Y**R**R**I**Y**P**PD**D**K**L**L**E**K**Y**ET**L**L**A**A**F**Q**T**F**L**S**G**R**A**A**S**L**Q**R**E**M**N**N**PL**K**R**K** 499  
*G. gallus* QIS**KE**E**EN**R**H**M**G**N**Y**R**R**I**Y**P**PD**D**K**S**L**E**K**Y**ES**L**L**A**T**A**F**Q**T**F**L**A**G**R**A**A**S**L**Q**R**E**M**N**N**PL**K**R**K 498  
*X. laevis* QIS**RE**E**Y**EN**R**H**L**G**N**Y**R**R**I**Y**P**PE**D**K**L**L**E**K**Y**ES**L**L**A**F**Q**T**F**L**A**G**R**A**A**S**L**Q**R**E**M**N**N**PL**K**R**K** 501  
*L. chalumnae* QIS**KE**E**EN**R**H**L**G**N**Y**R**R**I**Y**P**PD**D**K**L**L**E**K**Y**ES**L**L**T**A**F**Q**T**F**L**S**G**R**A**V**S**L**Q**R**E**M**N**N**PL**K**R**K** 498  
*D. rerio* QV**S**R**E**E**HK**R**L**G**N**Y**R**R**I**Y**P**PD**D**K**L**L**E**K**Y**ES**L**L**S**A**F**Q**T**F**L**A**G**R**A**A**S**L**Q**K**E**M**N**N**PL**K**R**K 501  
*S. kowalevskii* EN**A**R**E**E**Y**EN**R**N**M**G**R**F**R**V**F**P**PT**D**K**F**T**T**IR**V**T**G**L**L**A**D**A**F**Q**L**F**L**S**G**R**A**A**S**L**Q**K**E**V**T**R**A**F**Q**L** 538

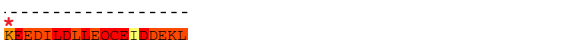

*H. sapiens* \*KEED**IL**DL**L**EQ**CE**IL**D**DE**K**L 1  
*M. musculus* REED**LL**DL**L**EQ**CE**IL**D**DE**K**L 1  
*A. carolinensis* KEED**IL**DL**L**EQ**CE**IL**D**DE**K**L 1  
*G. gallus* KEED**IL**DL**L**EQ**CE**IL**D**DE**K**L 1  
*X. laevis* KEED**IL**DL**L**EQ**CE**IL**D**DE**K**L 1  
*L. chalumnae* KEED**IL**DL**L**EQ**CE**Q**D**DE**K**L 1  
*D. rerio* KEED**IL**DL**L**EQ**CE**IL**D**DE**K**L 1  
*S. kowalevskii* REDE**IL**DM**L**Q**CE**IL**D**GD**Y** 1
